# Supplementary material
Source: ML conference proceedings conference paper supplement (https://openaccess.thecvf.com/content/ICCV2023/html/Zhang_NeILF_Inter-Reflectable_Light_ICCV_2023_paper.html)
Supplement: Supplementary file 3 [file Zhang_NeILF_Inter-Reflectable_Light_ICCV_2023_supplemental.zip]

Archive with 4 entries (4 files):
- 09402-supp.mp4
- __MACOSX/._09402-supp.mp4
- 09402-supp.pdf
- __MACOSX/._09402-supp.pdf
